# Supplementary material
Source: PubMed Central journal article supplement (PMC5540760)
Supplement: NIHMS859928-supplement-2.pdf [file NIHMS859928-supplement-2.pdf]

|              |               | Sample size |     |     |
|--------------|---------------|-------------|-----|-----|
| True $\pi_R$ | P(early stop) | P25         | P50 | P75 |
| 0.05         | 0.466         | 15          | 25  | 25  |
| 0.10         | 0.208         | 25          | 25  | 25  |
| 0.15         | 0.089         | 25          | 25  | 25  |
| 0.20         | 0.037         | 25          | 25  | 25  |

**Supplemental Table 1.** Operating characteristics. A summary of the probability of stopping the trial early for the indicated true response rates.
