# Supplementary material
Source: PubMed Central journal article supplement (PMC5540760)
Supplement: NIHMS859928-supplement-3.pdf [file NIHMS859928-supplement-3.pdf]

| <b>Hematologic Toxicity</b>                          | <b>Action</b>                                                                                              | <b>Dose Adjustments</b>    |                                     |                            |                            |                      |
|------------------------------------------------------|------------------------------------------------------------------------------------------------------------|----------------------------|-------------------------------------|----------------------------|----------------------------|----------------------|
|                                                      |                                                                                                            | <b>Dasatinib</b>           | <b>Cetuximab</b><br>(if applicable) | <b>Oxaliplatin</b>         | <b>Leucovorin</b>          | <b>5-FU Infusion</b> |
| <b>Neutropenia</b>                                   | * if applicable                                                                                            |                            |                                     |                            |                            |                      |
| Grade 1                                              | Continue treatment                                                                                         | No change                  | No change                           | No change                  | No change                  | No change            |
| Grade 2                                              | Hold other treatment until ANC recovers to $\geq 1500 / m^3$<br><br>Consider growth factor with next cycle | No change                  | No change                           | No change                  | No change                  | No change            |
| Grade 3                                              | Hold all treatment until ANC recovers to $\geq 1500 / m^3$<br><br>Consider growth factor with next cycle   | No change                  | No change                           | Decrease by one dose level | Decrease by one dose level | No change            |
| Grade 4                                              | Hold all treatment until ANC recovers to $\geq 1500 / m^3$<br><br>Consider growth factor with next cycle   | Decrease by one dose level | No change                           | Decrease by one dose level | Decrease by one dose level | No change            |
| <b>Thrombocytopenia</b>                              |                                                                                                            |                            |                                     |                            |                            |                      |
| Grade 1                                              | Continue treatment                                                                                         | No change                  | No change                           | No change                  | No change                  | No change            |
| Grade 2                                              | Hold other treatment until platelets $\geq 75,000$                                                         | No change                  | No change                           | No change                  | Decrease by one dose level | No change            |
| Recurrent Grade 2                                    | Hold other treatment until platelets $\geq 75,000$                                                         | No change                  | No change                           | Decrease by one dose level | Decrease by one dose level | No change            |
| Grade 3 or 4                                         | Hold all treatment until platelets $\geq 100,000$                                                          | Decrease by one dose level | No change                           | Decrease by one dose level | Decrease by one dose level | No change            |
| <b>Febrile Neutropenia</b>                           |                                                                                                            |                            |                                     |                            |                            |                      |
| Grade 3 or 4<br>(ANC < 1000/ mm <sup>3</sup> , Fever | Hold all treatment until ANC recovers to $\geq 1500 / mm^3$ and temperature is < 38°C                      | Decrease by one dose       | No change                           | Decrease by one dose level | Decrease by one dose level | No change            |

|                                                                                                   |                                                                                                                                                                                                           |                            |           |                            |                            |           |
|---------------------------------------------------------------------------------------------------|-----------------------------------------------------------------------------------------------------------------------------------------------------------------------------------------------------------|----------------------------|-----------|----------------------------|----------------------------|-----------|
| ≥ 38.5°C -without clinically or microbiologically documented infection)                           |                                                                                                                                                                                                           | level                      |           |                            |                            |           |
| <b>Anemia</b>                                                                                     |                                                                                                                                                                                                           |                            |           |                            |                            |           |
| Grade 1-2 or Grade 3 managed by transfusions and/or growth factors                                | Continue treatment                                                                                                                                                                                        | No change                  | No change | No change                  | No change                  | No change |
| Grade 3 (not satisfactorily managed by transfusions and/or growth factors) and Grade 4            | Hold all treatment until Hgb has recovered                                                                                                                                                                | Decrease by one dose level | No change | Decrease by one dose level | Decrease by one dose level | No change |
| <b>Bleeding</b>                                                                                   |                                                                                                                                                                                                           |                            |           |                            |                            |           |
| Hemorrhage<br><br>≥ Grade 2 or clinically significant bleeding in the opinion of the Investigator | The investigator will consider a possible dose adjustment or discontinuation of treatment. The decision will be made based on the severity of the bleeding episode, and the judgment of the Investigator. |                            |           |                            |                            |           |

| Non-Hematologic Toxicity    | Action                                         | Dose Modification |                           |             |                            |                            |
|-----------------------------|------------------------------------------------|-------------------|---------------------------|-------------|----------------------------|----------------------------|
|                             |                                                | Dasatinib         | Cetuximab (if applicable) | Oxaliplatin | Leucovorin                 | 5-FU Infusion              |
| <b>Hand-Foot syndrome</b>   |                                                |                   |                           |             |                            |                            |
| Grade 1-2                   | Continue Treatment                             | No change         | No change                 | No change   | No change                  | No change                  |
| Grade 3                     | Hold all treatment until recovery to ≤ grade 1 | No change         | No change                 | No change   | No change                  | Decrease by one dose level |
| <b>Diarrhea<sup>a</sup></b> |                                                |                   |                           |             |                            |                            |
| Grade 1                     | Continue Treatment                             | No change         | No change                 | No change   | No change                  | No change                  |
| Grade 2                     | Continue treatment                             | No change         | No change                 | No change   | Decrease by one dose level | No change                  |
| Recurrent Grade 2           | Continue                                       | No change         | No change                 | No change   | Decrease by one            | Decrease by one            |

|                                           | treatment                                                                                                                                                                                                                                                                                                      |                            |           |                            | dose level                 | dose level                 |
|-------------------------------------------|----------------------------------------------------------------------------------------------------------------------------------------------------------------------------------------------------------------------------------------------------------------------------------------------------------------|----------------------------|-----------|----------------------------|----------------------------|----------------------------|
| Grade 3                                   | Hold all treatment until recovery to $\leq$ grade 1                                                                                                                                                                                                                                                            | No change                  | No change | Decrease by one dose level | Discontinue                | Decrease by one dose level |
| Grade 4                                   | Patient will be discontinued from treatment unless the Investigator feels that it is in the best interest of the patient to receive additional therapy. If patient does continue treatment, the dose reduction will be determined by the Investigator following a resolution of the toxicity to $\leq$ grade 1 |                            |           |                            |                            |                            |
| <b>Mucositis<sup>a</sup></b>              |                                                                                                                                                                                                                                                                                                                |                            |           |                            |                            |                            |
| Grade 1 or Grade 2 (tolerable to patient) | Continue Treatment                                                                                                                                                                                                                                                                                             | No change                  | No change | No change                  | No change                  | No change                  |
| Grade 2 (intolerable to patient)          | Continue Treatment                                                                                                                                                                                                                                                                                             | No change                  | No change | No change                  | Decrease by one dose level | Decrease by one dose level |
| Grade 3                                   | Hold all treatment until recover to $\leq$ grade 1                                                                                                                                                                                                                                                             | No change                  | No change | No change                  | Discontinue                | Decrease by one dose level |
| Grade 4                                   | Patient will be discontinued from treatment unless the Investigator feels that it is in the best interest of the patient to receive additional therapy. If patient does continue treatment, the dose reduction will be determined by the Investigator following a resolution of the toxicity to $\leq$ grade 1 |                            |           |                            |                            |                            |
| <b>Dyspnea<sup>c</sup></b>                |                                                                                                                                                                                                                                                                                                                |                            |           |                            |                            |                            |
| Grade 1                                   | Continue Treatment                                                                                                                                                                                                                                                                                             | No change                  | No change | No change                  | No change                  | No change                  |
| Grade 2                                   | Hold dasatinib treatment until $\leq$ grade 1                                                                                                                                                                                                                                                                  | No change                  | No change | No change                  | No change                  | No change                  |
| Grade 3                                   | Hold all treatment until recover to $\leq$ grade 1                                                                                                                                                                                                                                                             | Decrease by one dose level | No change | No change                  | No change                  | No change                  |
| Grade 4                                   | Patient will be discontinued from treatment unless the Investigator feels that it is in the best interest of the patient to receive additional therapy. If patient does continue treatment, the dose reduction will be determined by the Investigator following a resolution of the toxicity to $\leq$ grade 1 |                            |           |                            |                            |                            |
| <b>Fatigue<sup>a</sup></b>                |                                                                                                                                                                                                                                                                                                                |                            |           |                            |                            |                            |
| Grade 1                                   | Continue treatment                                                                                                                                                                                                                                                                                             | No change                  | No change | No change                  | No change                  | No change                  |

|                       |                                                                                                                                                                                                                                                                                                                |                            |                            |                            |                            |                            |
|-----------------------|----------------------------------------------------------------------------------------------------------------------------------------------------------------------------------------------------------------------------------------------------------------------------------------------------------------|----------------------------|----------------------------|----------------------------|----------------------------|----------------------------|
| Grade 2               | Continue treatment                                                                                                                                                                                                                                                                                             | No change                  | No change                  | Decrease by one dose level | Decrease by one dose level | Decrease by one dose level |
| Grade 3               | Hold all treatment until recovery to $\leq$ grade 2                                                                                                                                                                                                                                                            | No change                  | No change                  | Decrease by one dose level | Decrease by one dose level | Decrease by one dose level |
| Grade 3, recurrent    | Hold all treatment until recovery to $\leq$ grade 2                                                                                                                                                                                                                                                            | Decrease by one dose level | No change                  | Decrease by one dose level | Decrease by one dose level | Decrease by one dose level |
| Grade 4               | Patient will be discontinued from treatment unless the Investigator feels that it is in the best interest of the patient to receive additional therapy. If patient does continue treatment, the dose reduction will be determined by the Investigator following a resolution of the toxicity to $\leq$ grade 1 |                            |                            |                            |                            |                            |
| <b>Acneiform Rash</b> |                                                                                                                                                                                                                                                                                                                |                            |                            |                            |                            |                            |
| Grade 1 – 2           | Continue Treatment                                                                                                                                                                                                                                                                                             | No change                  |
| Grade 3               | Hold all treatment until recovery to $\leq$ grade 2                                                                                                                                                                                                                                                            | No change                  | Decrease by one dose level | No change                  | No change                  | No change                  |

| Toxicity                           | Action                                                                                               | Dose Modification                                         |                           |                                      |            |               |
|------------------------------------|------------------------------------------------------------------------------------------------------|-----------------------------------------------------------|---------------------------|--------------------------------------|------------|---------------|
|                                    |                                                                                                      | Dasatinib                                                 | Cetuximab (if applicable) | Oxaliplatin                          | Leucovorin | 5-FU Infusion |
| Neuropathy                         |                                                                                                      |                                                           |                           |                                      |            |               |
| Grade 1 – 4                        | See table below for action taken with oxaliplatin.                                                   | No Change                                                 | No Change                 | See Table below for dose adjustments | No Change  | No Change     |
| <b>QT prolongation<sup>b</sup></b> |                                                                                                      |                                                           |                           |                                      |            |               |
| QTc $\geq$ 500msec but < 530msec   | EKG monitoring in these patients should be done every 24 to 72 hours until QTc returns below 500msec | Hold the next two doses and reduce dose by one dose level | No Change                 | No Change                            | No Change  | No Change     |
| QTc $\geq$ 530 msec                | Patient will be discontinued from the study                                                          |                                                           |                           |                                      |            |               |

|                                              |                                                                                                                                                                                                                                                                                                                |                            |           |                            |                            |                            |
|----------------------------------------------|----------------------------------------------------------------------------------------------------------------------------------------------------------------------------------------------------------------------------------------------------------------------------------------------------------------|----------------------------|-----------|----------------------------|----------------------------|----------------------------|
| <b>Thrombosis/thrombus/<br/>Embolism</b>     |                                                                                                                                                                                                                                                                                                                |                            |           |                            |                            |                            |
| Grade 1-3                                    |                                                                                                                                                                                                                                                                                                                | No change                  | No change | No change                  | No change                  | No change                  |
| Grade 4<br>(Asymptomatic PE)                 |                                                                                                                                                                                                                                                                                                                | No change                  | No change | No change                  | No change                  | No change                  |
| Grade 4<br>(Symptomatic PE)                  | Hold therapy until resolution of symptoms, then restart at the same dose level or, restart at a decreased dose determined by the investigator                                                                                                                                                                  |                            |           |                            |                            |                            |
| <b>Other<br/>Non-Hematologic<sup>a</sup></b> |                                                                                                                                                                                                                                                                                                                |                            |           |                            |                            |                            |
| Grade 1                                      | Continue Treatment                                                                                                                                                                                                                                                                                             | No change                  | No change | No change                  | No change                  | No change                  |
| Grade 2                                      | Continue Treatment                                                                                                                                                                                                                                                                                             | No change                  | No change | No change                  | No change                  | No change                  |
| Grade 3                                      | Hold all treatment until patient has recovered to $\leq$ grade 1 or to baseline                                                                                                                                                                                                                                | Decrease by one dose level | No change | Decrease by one dose level | Decrease by one dose level | Decrease by one dose level |
| Grade 4                                      | Patient will be discontinued from treatment unless the Investigator feels that it is in the best interest of the patient to receive additional therapy. If patient does continue treatment, the dose reduction will be determined by the Investigator following a resolution of the toxicity to $\leq$ grade 1 |                            |           |                            |                            |                            |

**Supplemental Table 2.** Symptom-specific dose adjustment tables.

a: Excluding alopecia. Despite adequate/maximal medical intervention and/or prophylaxis.

b: In all decisions for dose modifications and additional ECG monitoring, the Fridericia correction will supercede the Bazett's. The automated ECG machine reading will provide a QTc calculated with Bazett's. These readings may be used for real-time decision making for continued treatment and monitoring. If the machine-generated QTc is  $\geq$  500 msec, the investigator or a cardiology consultant may over-read the ECG to base decisions for subsequent ECG monitoring and dose modifications.

c: Attributed to pleural effusion
