# Supplementary material
Source: PubMed Central journal article supplement (PMC5540760)
Supplement: NIHMS859928-supplement-4.pdf [file NIHMS859928-supplement-4.pdf]

### Phase IB

| Agent                      | Starting Dose                            | Dose Adjustment Level -1                | Dose Adjustment Level -2               |
|----------------------------|------------------------------------------|-----------------------------------------|----------------------------------------|
| <b>Dasatinib</b>           | 70mg<br>100mg<br>150mg<br>200mg<br>250mg | 50mg<br>70mg<br>100mg<br>150mg<br>190mg | 20mg<br>50mg<br>70mg<br>100mg<br>120mg |
| <b>Cetuximab*</b>          | 250 mg/kg                                | 200mg/kg                                | 150mg/kg                               |
| <b>Oxaliplatin</b>         | 85 mg/m <sup>2</sup>                     | 70 mg/m <sup>2</sup>                    | 65 mg/m <sup>2</sup>                   |
| <b>Leucovorin</b>          | 400 mg/m <sup>2</sup>                    | 200 mg/m <sup>2</sup>                   | Discontinue                            |
| <b>5-FU 46-hr infusion</b> | 2.4 gm/m <sup>2</sup>                    | 2.0 gm/m <sup>2</sup>                   | 1.8 gm/m <sup>2</sup>                  |

\*After first dose of 400mg/kg on cycle 1, day 1, subsequent doses are 250mg/kg.

### Phase II

| Agent                            | Starting Dose         | Dose Adjustment Level -1 | Dose Adjustment Level -2 |
|----------------------------------|-----------------------|--------------------------|--------------------------|
| <b>Dasatinib</b>                 | 100mg                 | 70mg                     | 50mg                     |
| <b>Cetuximab (if applicable)</b> | 500 mg/kg             | 400mg/kg                 | 250mg/kg                 |
| <b>Oxaliplatin</b>               | 85 mg/m <sup>2</sup>  | 70 mg/m <sup>2</sup>     | 65 mg/m <sup>2</sup>     |
| <b>Leucovorin</b>                | 400 mg/m <sup>2</sup> | 200 mg/m <sup>2</sup>    | Discontinue              |
| <b>5-FU 46-hr infusion</b>       | 2.4 gm/m <sup>2</sup> | 2.0 gm/m <sup>2</sup>    | 1.8 gm/m <sup>2</sup>    |

**Supplemental Table 3.** Prespecified dose modifications for adverse events related to study drug in Phase IB and Phase II.
