# Supplementary material
Source: PubMed Central journal article supplement (PMC5540760)
Supplement: NIHMS859928-supplement-7.pdf [file NIHMS859928-supplement-7.pdf]

## SUPPLEMENTAL FIGURE LEGENDS

**Supplemental Figure 1.** Validation of peripheral blood mononuclear cells as a biomarker of Src inhibition. Freshly collected peripheral blood mononuclear cells from a healthy volunteer were treated *ex-vivo* with dasatinib 300 nM or hydrogen peroxide 0.05 mM. The peripheral blood mononuclear cell lysates were generated and immunoblotted for phosphoFAK [Y861] and phosphopaxillin [Y118].

**Supplemental Figure 2.** Lack of correlation between Src activity in PBMCs and hepatic tumors. For the patients in the expansion cohort, the change in the expression of pSrc and total Src was not correlated with a change in the phosphorylation of the Src substrate paxillin. Patients with no change or a decrease in the expression of pSrc or Src from baseline to C2D8 were included in the “no increase” category.
