# Supplementary material
Source: PubMed Central journal article supplement (PMC5540760)

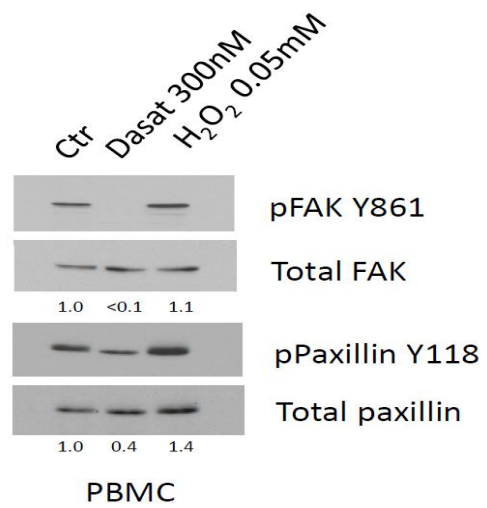

**Supplemental Figure 1**

Supplement: NIHMS859928-supplement-5.pdf [file NIHMS859928-supplement-5.pdf]

Supplemental Figure 2

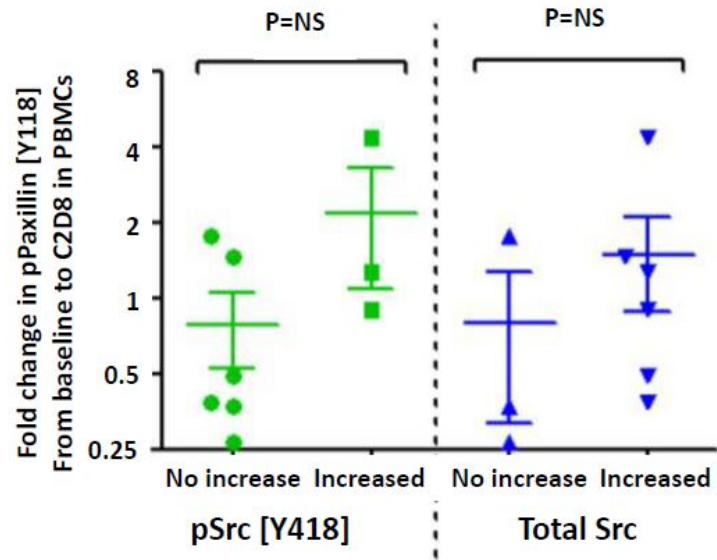

Change in Expression of Liver Biopsy from Baseline to Cycle 2, Day 8

Supplement: NIHMS859928-supplement-6.pdf [file NIHMS859928-supplement-6.pdf]
